# Supplementary material
Source: PubMed Central journal article supplement (PMC8577383)
Supplement: jvi.00610-21-s0001.pdf [file jvi.00610-21-s0001.pdf]

# Differentially expressed Immunoglobulin (Ig) genes

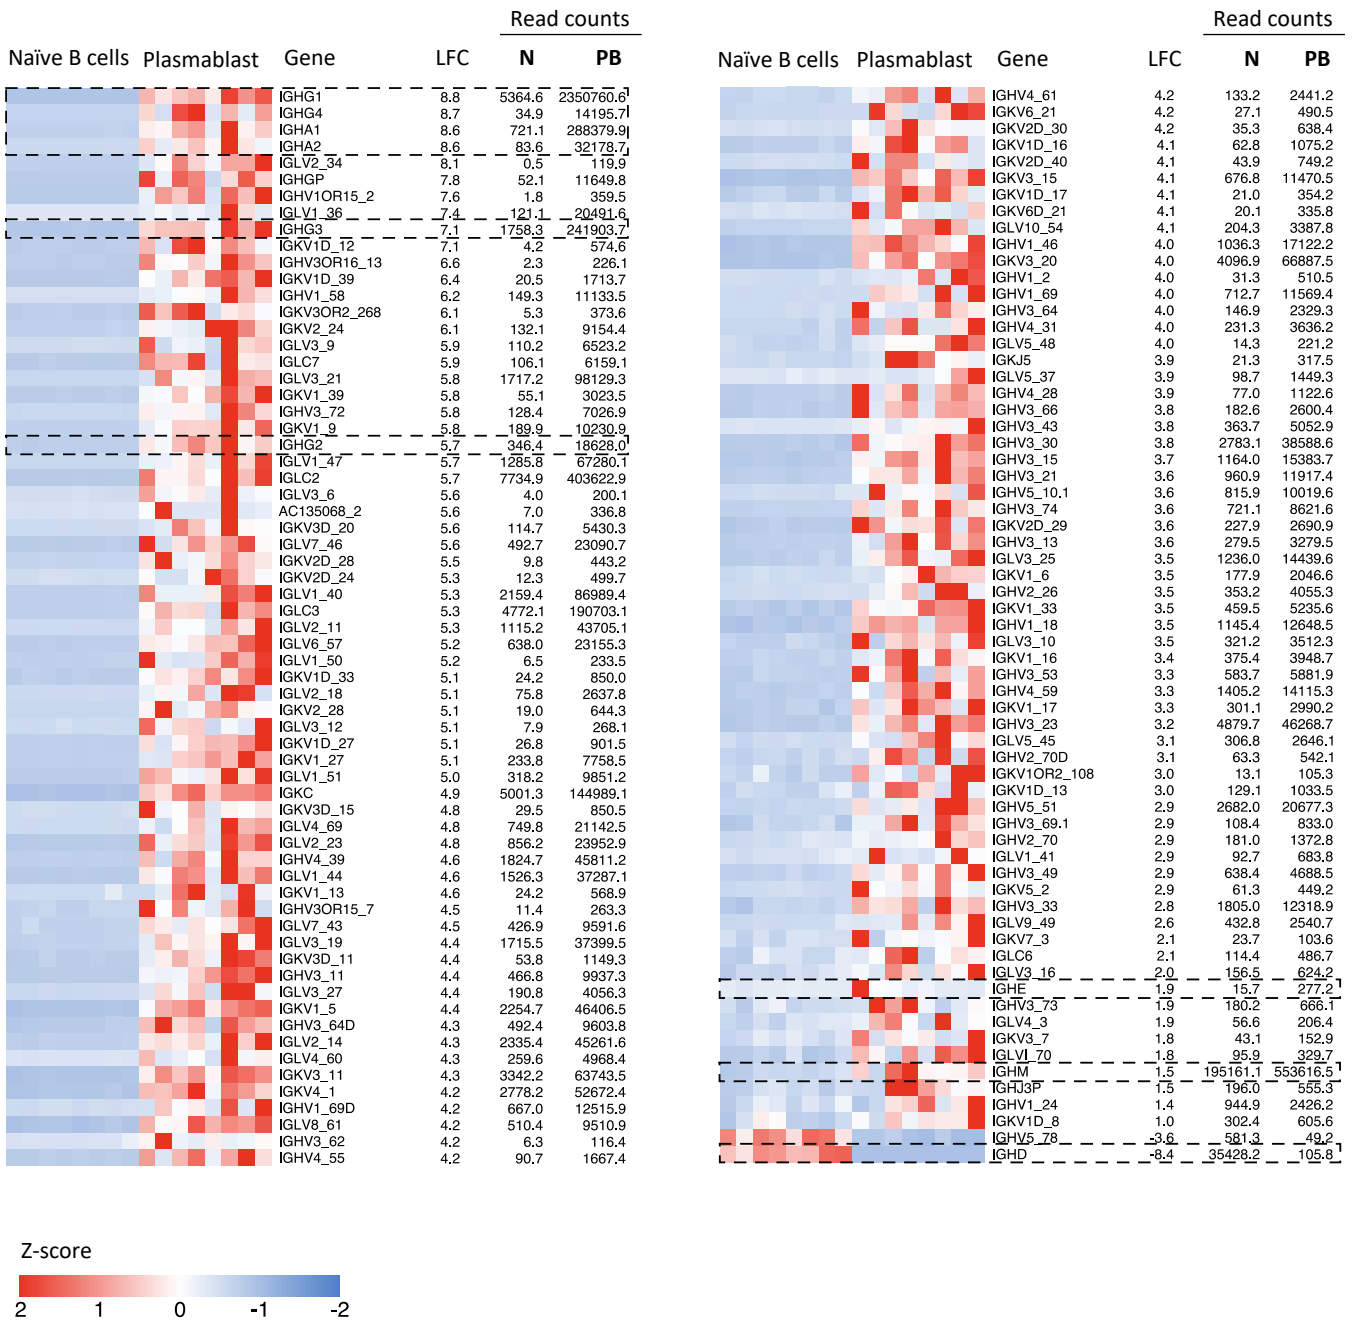

## SUPPLEMENTARY FIG 1 Heat maps of the differentially expressed Immunoglobulin genes.

130 immunoglobulin genes including variable and constant regions of heavy and light chains and pseudogenes are shown in the heatmap. IgG, IgA, IgM, IgE and IgD are shown in dotted boxes. Gradient of high to low gene expression based on z-score normalized counts is indicated from red to blue color. Genes that were significantly differential were only considered and clustered subjects using ward.D2 method. Right side of heatmap are gene name with common name in parenthesis, log2 fold change (LFC), average normalized counts of naïve B cells (N) and average normalized counts of plasmablast (PB).

### A Proliferation

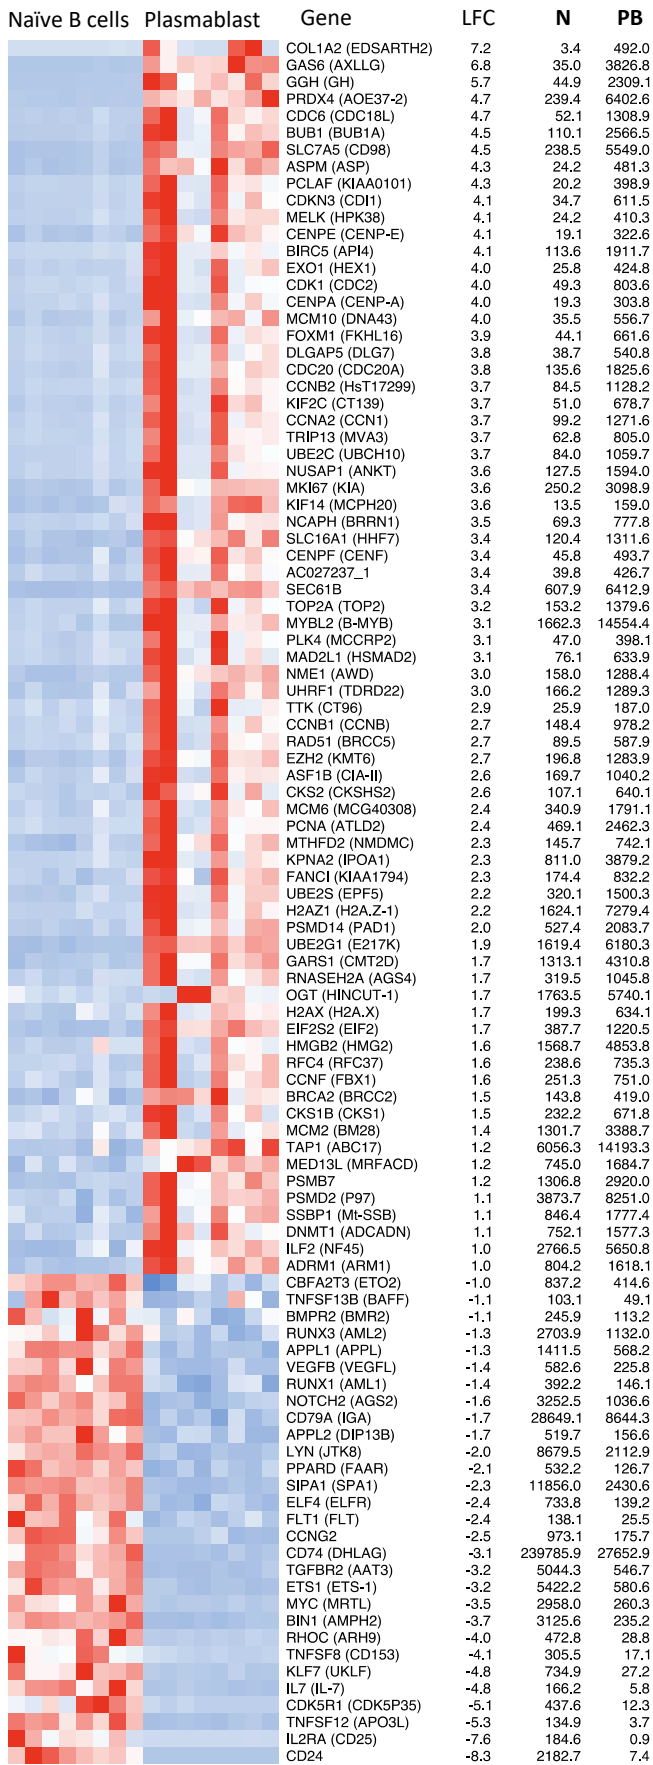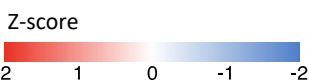

### B Metabolism

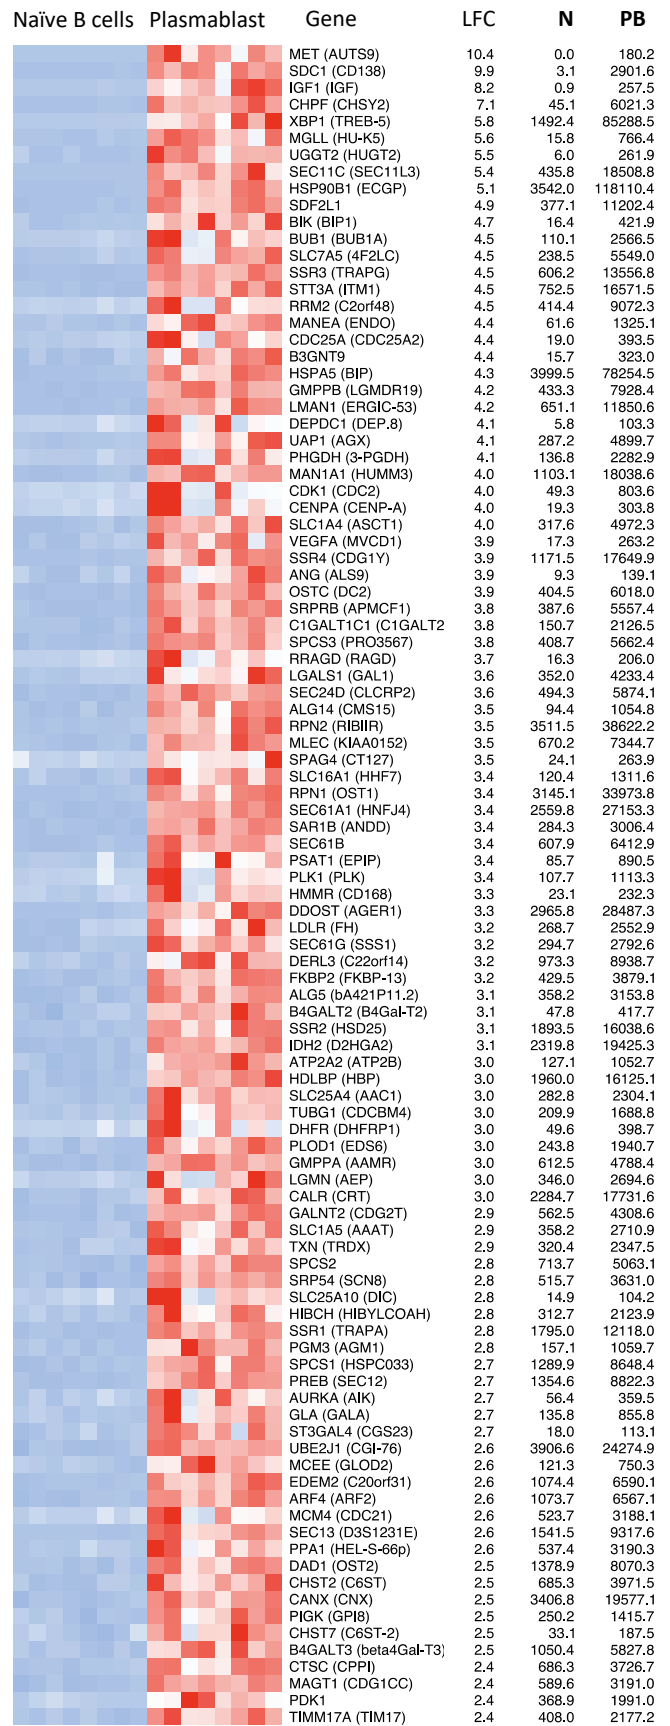

B Metabolism contd.

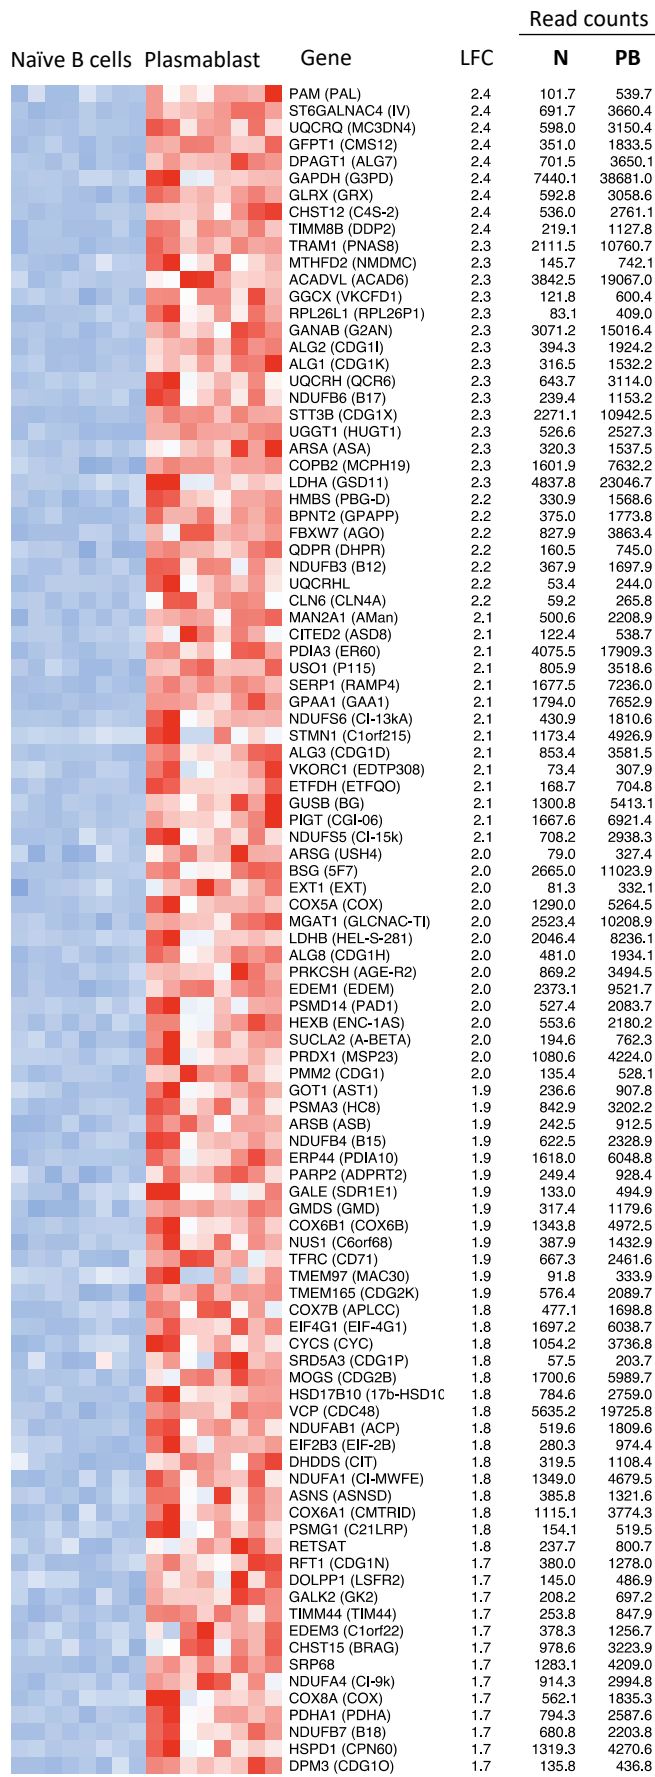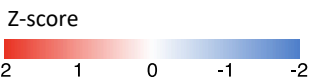

B Metabolism contd.

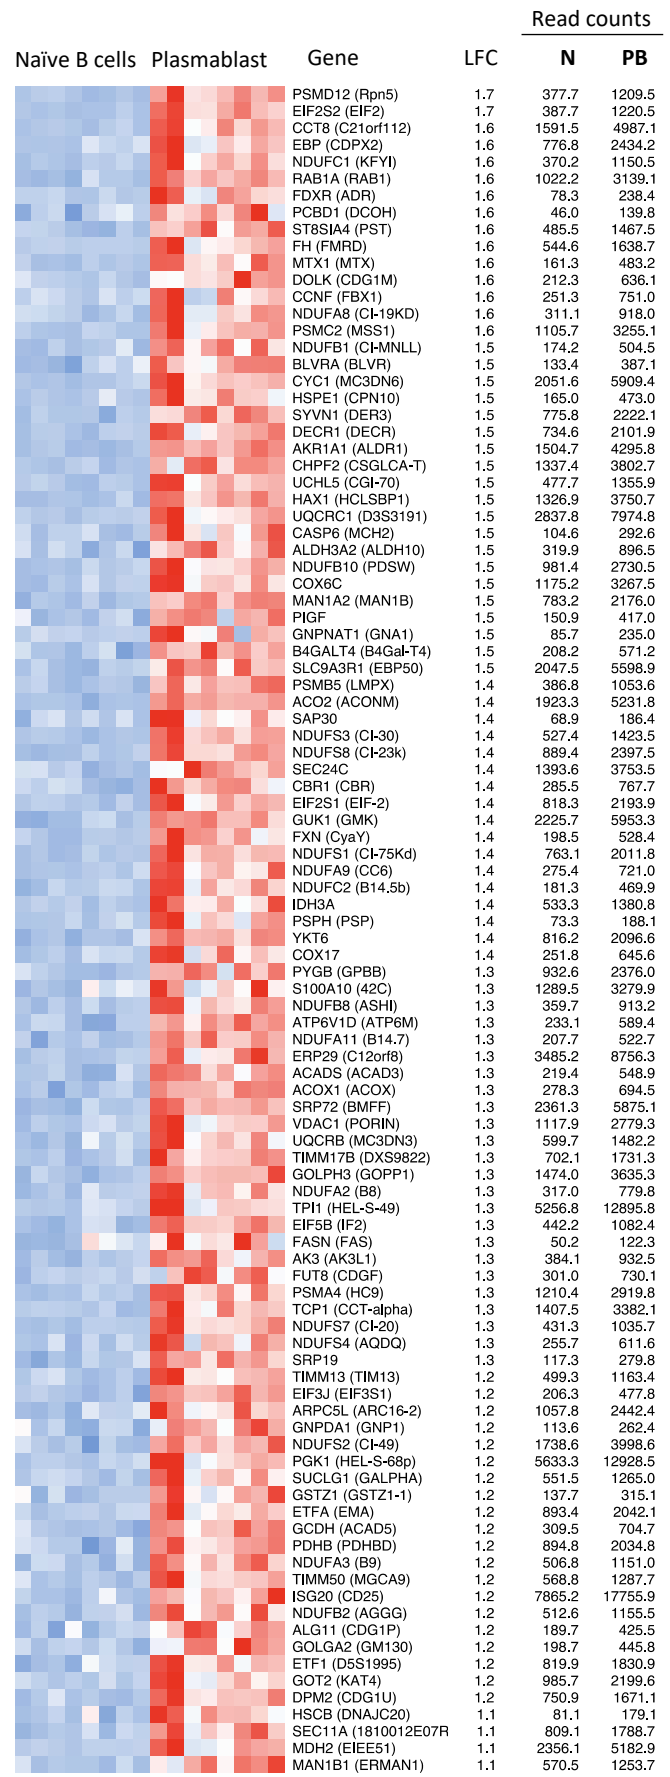

## B Metabolism contd.

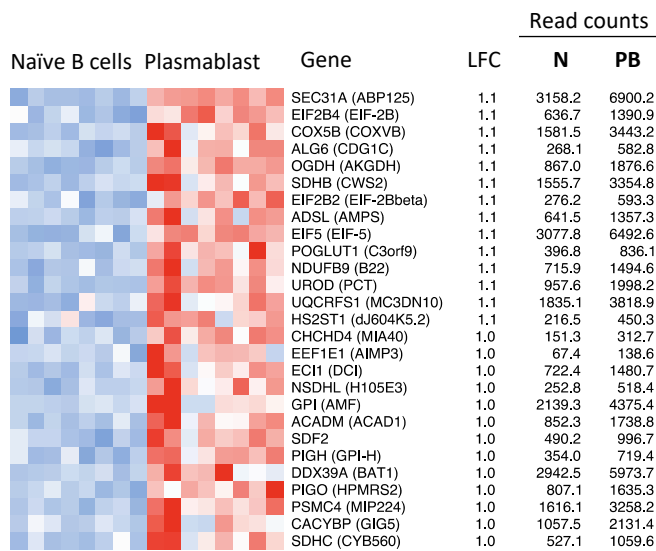

## C Antibody synthesis, glycosylation and secretion contd.

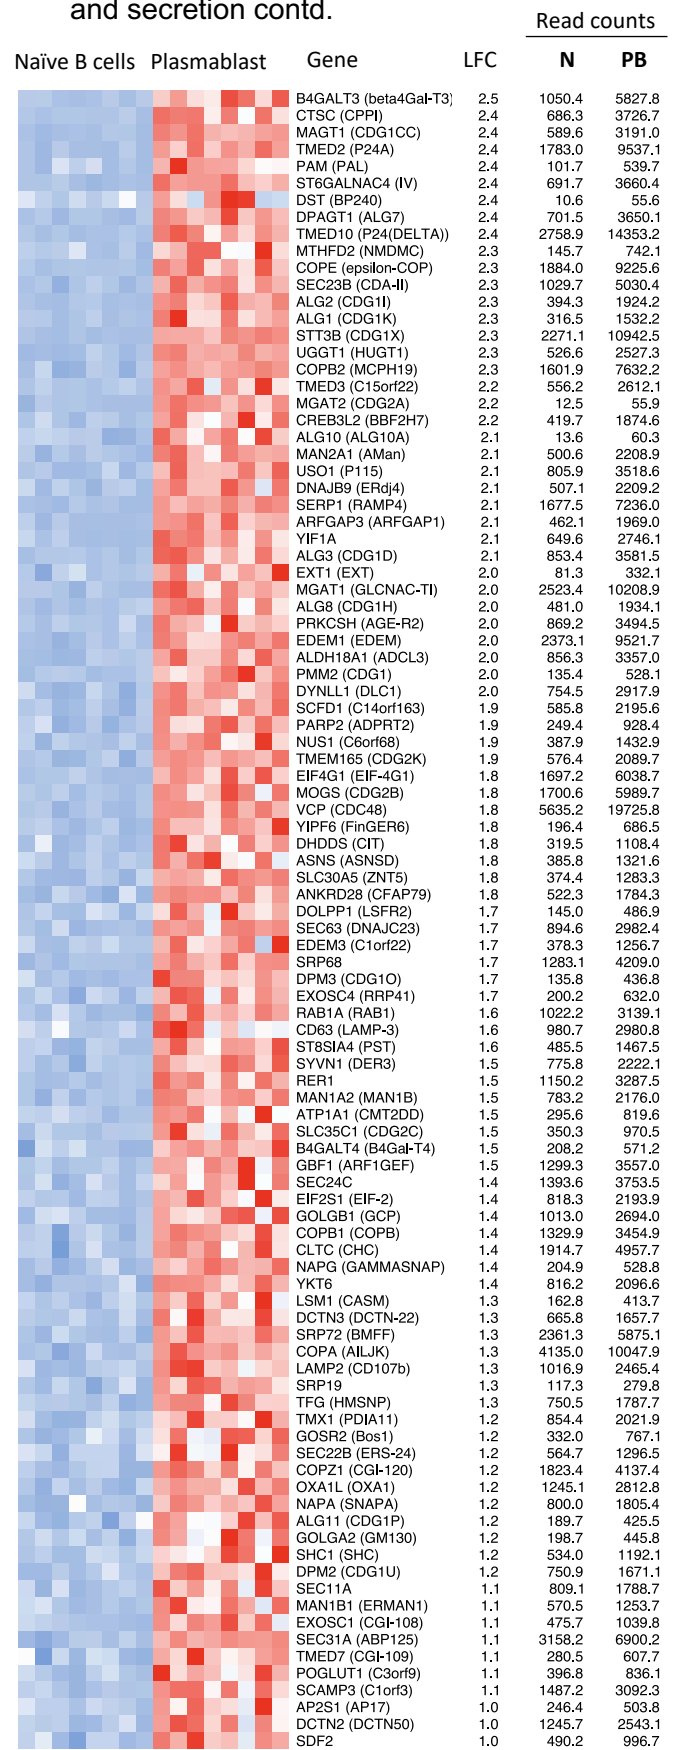

## C Antibody synthesis, glycosylation and secretion

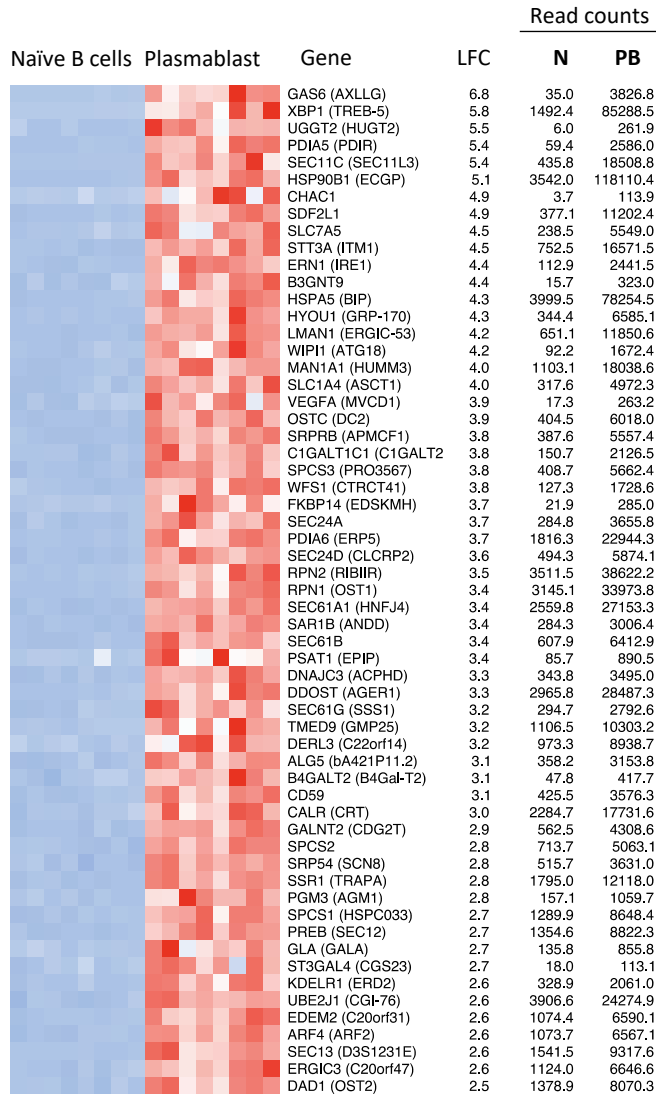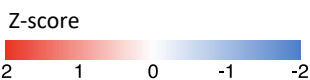

### D Growth factors

|  | Naïve B cells | Plasmablast | Gene            | LFC  | Read counts |        |
|--|---------------|-------------|-----------------|------|-------------|--------|
|  |               |             |                 |      | N           | PB     |
|  |               |             | IGF1 (IGF)      | 8.2  | 0.9         | 257.5  |
|  |               |             | BMP6 (VGR)      | 6.6  | 5.8         | 582.2  |
|  |               |             | MANF (ARMET)    | 4.5  | 238.0       | 5419.6 |
|  |               |             | VEGFA (MVCD1)   | 3.9  | 17.3        | 263.2  |
|  |               |             | BMP8B (BMP8)    | 3.2  | 22.0        | 204.5  |
|  |               |             | CD320 (8D6)     | 2.8  | 434.8       | 3089.9 |
|  |               |             | ADA2 (ADGF)     | 2.6  | 1516.1      | 9077.0 |
|  |               |             | IL12A (CLMF)    | 2.0  | 50.5        | 201.0  |
|  |               |             | MACC1 (7A5)     | 1.9  | 29.0        | 106.8  |
|  |               |             | GPI (AMF)       | 1.0  | 2139.3      | 4375.4 |
|  |               |             | TYMP (ECGF)     | 1.0  | 1733.2      | 3500.0 |
|  |               |             | RABEP2 (FRA)    | -1.2 | 899.9       | 385.1  |
|  |               |             | VEGFB (VEGFL)   | -1.4 | 582.6       | 225.8  |
|  |               |             | TGFB1 (CED)     | -1.4 | 1181.8      | 448.9  |
|  |               |             | RABEP1 (RAB5EP) | -1.9 | 2349.8      | 632.6  |
|  |               |             | AREG (AR)       | -2.0 | 180.8       | 46.7   |
|  |               |             | IL7             | -4.8 | 166.2       | 5.8    |
|  |               |             | CLCF1 (BSF-3)   | -9.4 | 316.3       | 0.4    |

### F Interferon stimulated genes (ISGs)

|  | Naïve B cells | Plasmablast | Gene               | LFC  | Read counts |         |
|--|---------------|-------------|--------------------|------|-------------|---------|
|  |               |             |                    |      | N           | PB      |
|  |               |             | IFI27L1 (FAM14B)   | 4.7  | 41.5        | 1044.8  |
|  |               |             | IFI27 (FAM14D)     | 3.9  | 950.4       | 14292.6 |
|  |               |             | IFI6 (JUN16)       | 3.7  | 752.7       | 10040.3 |
|  |               |             | APOL1              | 3.6  | 173.4       | 2101.8  |
|  |               |             | ZBP1 (C20orf183)   | 3.4  | 514.4       | 5504.1  |
|  |               |             | WARS1 (IFI53)      | 2.5  | 2902.3      | 16004.9 |
|  |               |             | LAP3               | 2.5  | 1408.7      | 7740.0  |
|  |               |             | CHST12 (C4S-2)     | 2.4  | 536.0       | 2761.1  |
|  |               |             | PSME2 (PA28B)      | 2.2  | 2184.4      | 10337.8 |
|  |               |             | ISG15 (G1P2)       | 2.1  | 1234.3      | 5243.9  |
|  |               |             | IFI35 (IFP35)      | 2.1  | 894.1       | 3751.8  |
|  |               |             | BST2 (CD317)       | 2.0  | 1422.8      | 5861.5  |
|  |               |             | IFNAR2 (IFN-R)     | 2.0  | 516.4       | 2118.2  |
|  |               |             | TNFSF10 (TRAIL)    | 1.9  | 398.9       | 1467.3  |
|  |               |             | ODF3B (FAP123)     | 1.8  | 265.9       | 944.9   |
|  |               |             | IFI27L2 (FAM14A)   | 1.8  | 234.1       | 829.8   |
|  |               |             | IFITM1 (SEP27)     | 1.6  | 1696.4      | 5249.4  |
|  |               |             | IFI44 (MTAP44)     | 1.6  | 421.3       | 1282.8  |
|  |               |             | USP18 (ISG43)      | 1.6  | 483.9       | 1463.1  |
|  |               |             | MX1 (IFI-78K)      | 1.6  | 4321.5      | 12739.2 |
|  |               |             | APOL6              | 1.4  | 462.4       | 1246.1  |
|  |               |             | APOBEC3G (A3G)     | 1.4  | 1757.3      | 4609.8  |
|  |               |             | ISG20 (CD25)       | 1.2  | 7865.2      | 17755.9 |
|  |               |             | NAPA               | 1.2  | 800.0       | 1805.4  |
|  |               |             | HSH2D (ALX)        | 1.1  | 2252.8      | 4776.2  |
|  |               |             | CGAS (C6orf150)    | 1.1  | 212.8       | 442.6   |
|  |               |             | OAS2               | 1.0  | 2334.9      | 4727.3  |
|  |               |             | IRF7 (IMD39)       | 1.0  | 2900.3      | 5864.0  |
|  |               |             | TYMP (ECGF)        | 1.0  | 1733.2      | 3500.0  |
|  |               |             | STAT1              | 1.0  | 4062.7      | 8189.1  |
|  |               |             | TRIM33 (ECTO)      | -1.1 | 1482.2      | 708.5   |
|  |               |             | ZC3HAV1 (ARTD13)   | -1.1 | 3998.7      | 1893.7  |
|  |               |             | SP100              | -1.1 | 6960.5      | 3247.2  |
|  |               |             | DDIT4 (Dig2)       | -1.2 | 1482.1      | 644.6   |
|  |               |             | SLC15A3 (OCTP)     | -1.3 | 168.2       | 70.2    |
|  |               |             | RNASEL (PRCA1)     | -1.3 | 303.0       | 124.8   |
|  |               |             | TRIM14             | -1.4 | 1227.5      | 464.9   |
|  |               |             | ZNFX1              | -1.5 | 2055.2      | 741.0   |
|  |               |             | DDX58 (RIG-I)      | -1.5 | 690.2       | 239.0   |
|  |               |             | HERC6              | -1.6 | 629.8       | 214.1   |
|  |               |             | SP110 (IFI41)      | -1.6 | 342.0       | 112.6   |
|  |               |             | IFIT5 (ISG58)      | -1.7 | 505.9       | 160.6   |
|  |               |             | SUN2 (UNC84B)      | -1.7 | 7217.0      | 2277.7  |
|  |               |             | PARP12 (ARTD12)    | -1.8 | 2610.5      | 741.6   |
|  |               |             | PPM1K (BDP)        | -1.9 | 3131.4      | 837.0   |
|  |               |             | IFITM3 (1-8U)      | -1.9 | 1803.0      | 481.1   |
|  |               |             | NUB1 (BS4)         | -1.9 | 1201.1      | 311.2   |
|  |               |             | DTX3L              | -2.0 | 1505.9      | 369.4   |
|  |               |             | XAF1 (BIRC4BP)     | -2.1 | 1707.4      | 391.8   |
|  |               |             | IFITM2 (1-8D)      | -2.2 | 5307.0      | 1181.0  |
|  |               |             | MX2 (MXB)          | -2.6 | 928.6       | 158.4   |
|  |               |             | GBP2               | -2.6 | 1268.2      | 214.8   |
|  |               |             | LGALS9 (HUAT)      | -2.6 | 466.7       | 78.5    |
|  |               |             | IFIT3 (CIG-49)     | -2.8 | 1108.9      | 161.7   |
|  |               |             | MAP3K14 (FTLDCR1B) | -2.8 | 1777.6      | 253.7   |
|  |               |             | CD74 (DHLG)        | -3.1 | 239785.9    | 27652.9 |
|  |               |             | JADE2 (JADE-2)     | -3.3 | 1207.8      | 121.8   |
|  |               |             | TRIM22             | -4.0 | 6784.2      | 415.7   |
|  |               |             | DDX60L             | -4.4 | 636.1       | 30.3    |
|  |               |             | IFIT2 (G10P2)      | -4.6 | 628.5       | 25.8    |
|  |               |             | DDX60              | -4.7 | 745.4       | 28.4    |
|  |               |             | GBP4 (Mpa2)        | -4.9 | 2651.8      | 91.1    |

### E Transcription factors

|  | Naïve B cells | Plasmablast | Gene                | LFC  | Read counts |         |
|--|---------------|-------------|---------------------|------|-------------|---------|
|  |               |             |                     |      | N           | PB      |
|  |               |             | BHLHA15 (BHLHB8)    | 7.7  | 7.3         | 1483.0  |
|  |               |             | MIXL1 (MILD1)       | 7.0  | 4.4         | 558.9   |
|  |               |             | TP73 (P73)          | 6.5  | 4.3         | 393.5   |
|  |               |             | XBP1 (TREB-5)       | 5.8  | 1492.4      | 85288.5 |
|  |               |             | E2F7                | 5.2  | 4.3         | 152.1   |
|  |               |             | PRDM1 (BLIMP1)      | 5.0  | 313.6       | 9903.2  |
|  |               |             | ZNF215 (BAZ-2)      | 4.8  | 13.2        | 369.0   |
|  |               |             | MSC (ABF-1)         | 4.5  | 6.0         | 133.5   |
|  |               |             | ARNTL2 (BMAL2)      | 4.4  | 9.5         | 207.2   |
|  |               |             | E2F8 (E2F-8)        | 4.3  | 9.6         | 185.1   |
|  |               |             | CENPA (CENP-A)      | 4.0  | 19.3        | 303.8   |
|  |               |             | FOXM1 (FKHL16)      | 3.9  | 44.1        | 661.6   |
|  |               |             | GFI1 (GFI-1)        | 3.9  | 46.0        | 673.9   |
|  |               |             | ATF5 (ATFX)         | 3.5  | 9.1         | 101.0   |
|  |               |             | E2F2 (E2F-2)        | 3.3  | 130.9       | 1272.7  |
|  |               |             | GLMP (C1orf85)      | 3.2  | 90.5        | 807.4   |
|  |               |             | MYBL2 (B-MYB)       | 3.1  | 1662.3      | 14554.4 |
|  |               |             | RUNX2 (AML3)        | 3.0  | 45.0        | 351.2   |
|  |               |             | ARID3A (BRIGHT)     | 2.9  | 98.0        | 707.3   |
|  |               |             | PRDM15 (C21orf83)   | 2.8  | 291.4       | 2073.3  |
|  |               |             | E2F1 (E2F-1)        | 2.8  | 114.9       | 807.0   |
|  |               |             | ZBTB32 (FAXF)       | 2.8  | 220.4       | 1539.2  |
|  |               |             | PREB (SEC12)        | 2.7  | 1354.6      | 8822.3  |
|  |               |             | MXD3 (BHLHC13)      | 2.6  | 88.5        | 542.6   |
|  |               |             | BHLHE41 (BHLHB3)    | 2.6  | 100.8       | 610.3   |
|  |               |             | IRF4 (LSIRF)        | 2.4  | 1254.9      | 6591.9  |
|  |               |             | CREB3L2 (BBF2H7)    | 2.2  | 419.7       | 1874.6  |
|  |               |             | ZBTB38 (CIBZ)       | 2.0  | 534.7       | 2195.9  |
|  |               |             | CREB3 (LUMAN)       | 2.0  | 672.3       | 2680.2  |
|  |               |             | KLF10 (EGF-alpha)   | 2.0  | 563.9       | 2231.0  |
|  |               |             | TET1 (CXXC6)        | 1.9  | 30.0        | 111.8   |
|  |               |             | NFE2L3 (NRF3)       | 1.9  | 34.7        | 126.8   |
|  |               |             | HMGAI1 (HMG-R)      | 1.6  | 994.4       | 2986.5  |
|  |               |             | STAT4 (SLEB11)      | 1.5  | 71.5        | 206.0   |
|  |               |             | POU2AF1 (BOB1)      | 1.5  | 2718.5      | 7555.2  |
|  |               |             | ZNF706 (HSPC038)    | 1.4  | 1416.1      | 3838.1  |
|  |               |             | ZNF841              | 1.4  | 100.9       | 269.9   |
|  |               |             | ZFAT (AITD3)        | 1.4  | 190.1       | 495.9   |
|  |               |             | ZEB2 (HSPC082)      | -4.8 | 1891.9      | 67.3    |
|  |               |             | ZNF835 (BC37295_3)  | -4.8 | 117.5       | 4.0     |
|  |               |             | ZBTB4 (KAISO-L1)    | -4.8 | 985.1       | 34.8    |
|  |               |             | ZNF318 (HRIHFB2436) | -4.8 | 5079.7      | 178.3   |
|  |               |             | PAX5 (ALL3)         | -4.8 | 3163.9      | 110.5   |
|  |               |             | L3MBTL3 (MBT-1)     | -4.9 | 238.2       | 7.9     |
|  |               |             | ZNF439              | -4.9 | 306.0       | 10.5    |
|  |               |             | IRF8 (H-ICSBP)      | -5.0 | 15464.6     | 486.8   |
|  |               |             | REL (C-Rel)         | -5.1 | 2072.0      | 59.0    |
|  |               |             | ZNF699 (hang)       | -5.1 | 131.7       | 3.5     |
|  |               |             | JAZF1 (TIP27)       | -5.2 | 349.1       | 9.9     |
|  |               |             | ZMAT1               | -5.3 | 196.4       | 4.6     |
|  |               |             | BCL11A (BCL11A-L)   | -5.4 | 2183.9      | 50.0    |
|  |               |             | ZNF677              | -5.5 | 150.8       | 3.1     |
|  |               |             | FOXP1 (12CC4)       | -5.6 | 9804.8      | 206.9   |
|  |               |             | ZNF502              | -5.6 | 131.0       | 2.6     |
|  |               |             | SATB1               | -5.6 | 1244.9      | 25.6    |
|  |               |             | TGIF1 (HPE4)        | -5.9 | 785.6       | 13.4    |
|  |               |             | SCML4 (uJ47M23.1)   | -6.1 | 528.3       | 7.5     |
|  |               |             | ZNF831 (C20orf174)  | -6.3 | 310.5       | 3.8     |
|  |               |             | ZNF665 (ZFP160L)    | -6.3 | 140.2       | 1.7     |
|  |               |             | ZNF571 (HSPC059)    | -6.7 | 133.8       | 1.2     |
|  |               |             | ZBTB16 (PLZF)       | -7.0 | 2480.2      | 19.7    |
|  |               |             | ZSCAN18 (ZNF447)    | -7.0 | 539.2       | 3.9     |
|  |               |             | KLF9 (BTEB)         | -7.1 | 306.8       | 2.3     |
|  |               |             | ZNF629 (ZNF)        | -7.2 | 148.1       | 1.1     |
|  |               |             | HHEX (HEX)          | -7.4 | 2173.0      | 13.2    |
|  |               |             | SPIB (SPI-B)        | -7.4 | 3292.6      | 19.3    |
|  |               |             | BACH2 (BTBD25)      | -7.4 | 2591.8      | 14.6    |
|  |               |             | CASZ1 (CAS11)       | -7.6 | 118.1       | 0.7     |
|  |               |             | ZFP28 (mkr5)        | -8.6 | 110.2       | 0.0     |
|  |               |             | ZNF415 (Pact)       | -8.6 | 113.9       | 0.0     |
|  |               |             | ZNF667 (MIPU1)      | -9.0 | 143.8       | 0.0     |
|  |               |             | ZNF135 (ZNF61)      | -9.6 | 231.0       | 0.0     |

Z-score

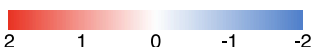

**SUPPLEMENTARY FIG 2** *Heat maps of the differentially expressed genes (DEGs) pertaining to select biological processes.* Heatmaps show genes related to **(A)** Proliferation, **(B)** Metabolism, **(C)** Antibody synthesis, glycosylation and secretion, **(D)** Growth factors, **(E)** Transcription factors (TFs) – top 50 upregulated and top 50 downregulated and **(F)** Interferon stimulated genes (ISGs). Gradient of high to low gene expression based on z-score normalized counts is indicated from red to blue color. Genes that were significantly differential are shown. Right side of heatmaps are gene name with common name in parenthesis, log<sub>2</sub> fold change (LFC), average normalized counts of naïve B cells (N) and average normalized counts of plasmablast (PB).
